# Supplementary material for: Cost-Effectiveness Analysis of Pembrolizumab Plus Chemotherapy as First-Line Therapy for Extensive-Stage Small-Cell Lung Cancer in the United States
Source: Preprints.org preprint supplement (doi:10.20944/preprints202102.0068.v1), 2021-02-01
Supplement: Supplementary file 1 [file Figure S1-S2.docx]

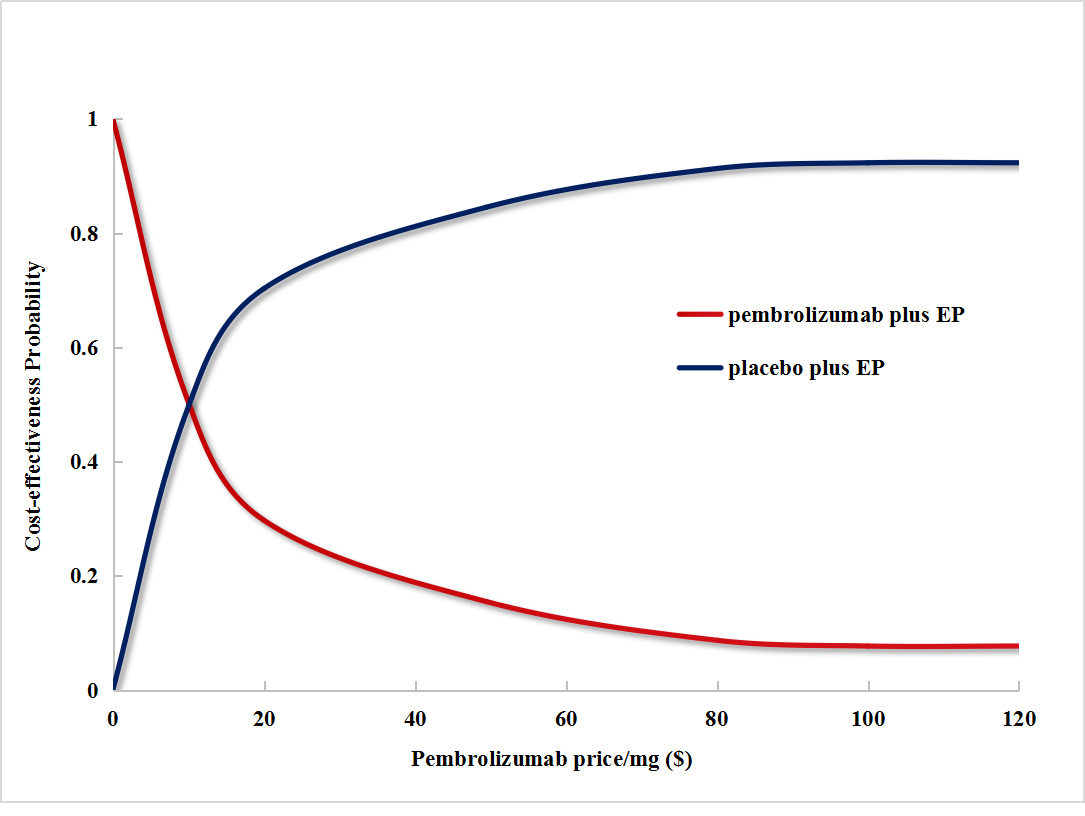


Figure S1. The cost-effectiveness acceptability curve.The red curve indicated the probability of pembrolizumab plus EP being cost-effective against placebo plus EP under different pembrolizumab price/mg at the WTP thresholds of $100,000 per QALY. QALY indicated quality-adjusted life-year; EP, etoposide-platinum.


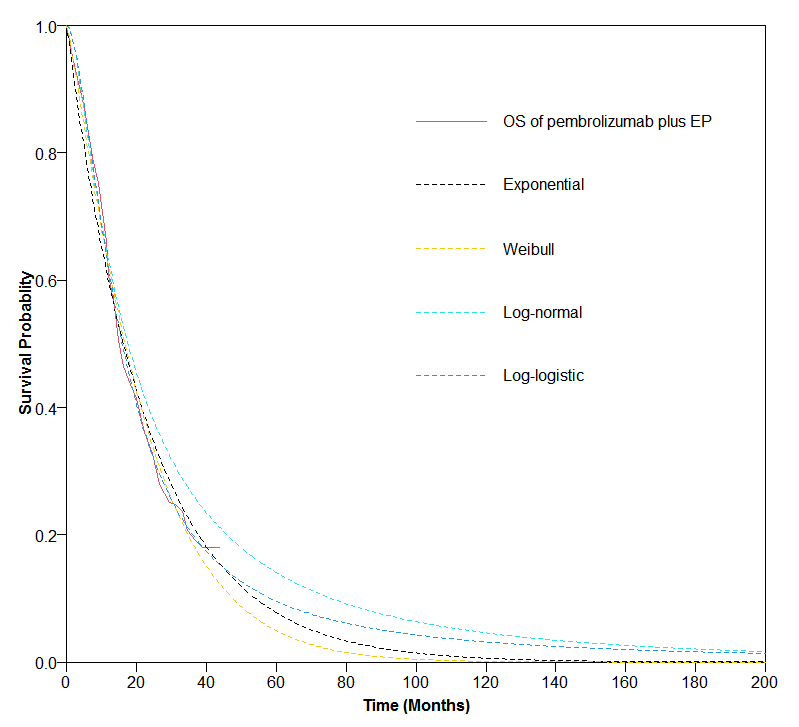


(a)


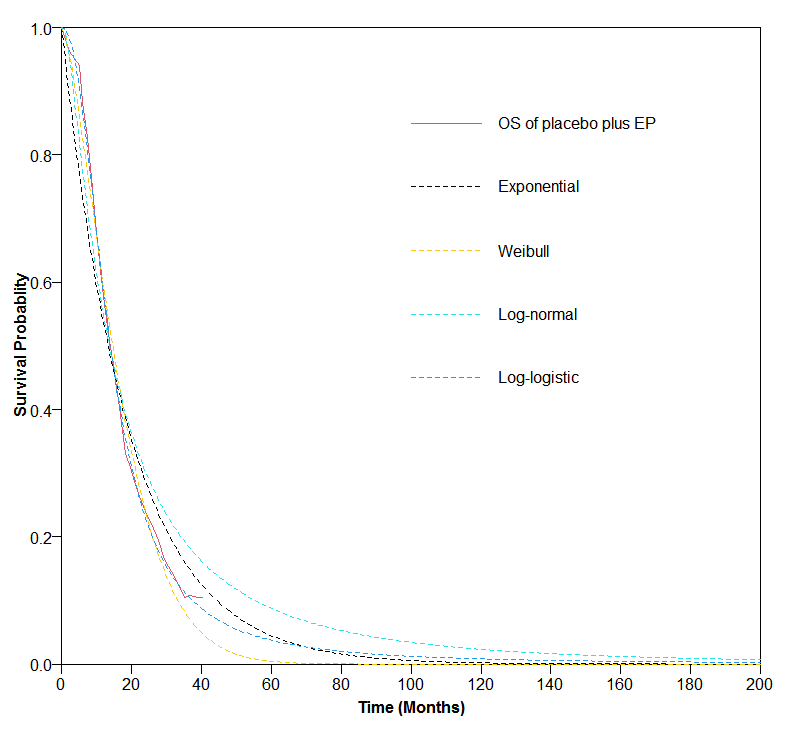


(b)


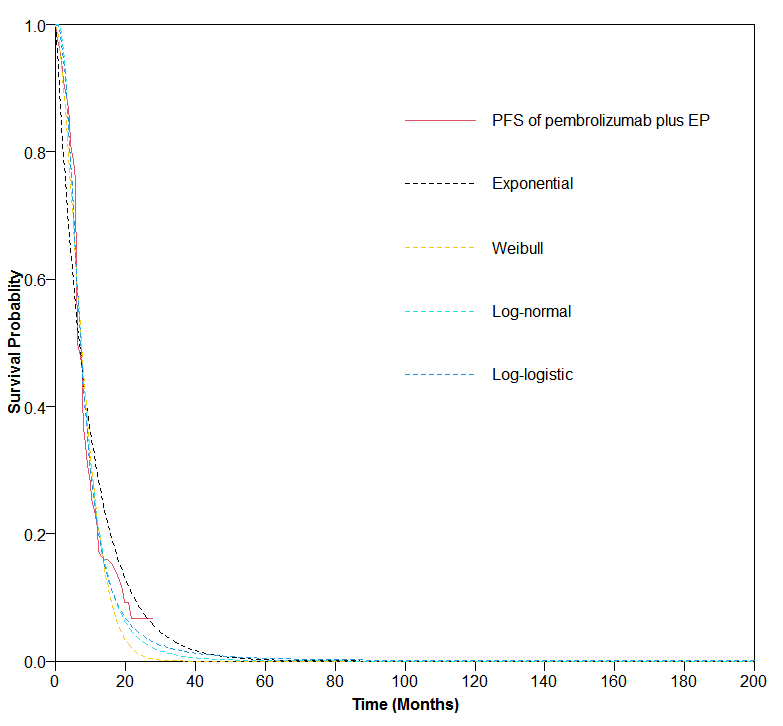


(c)


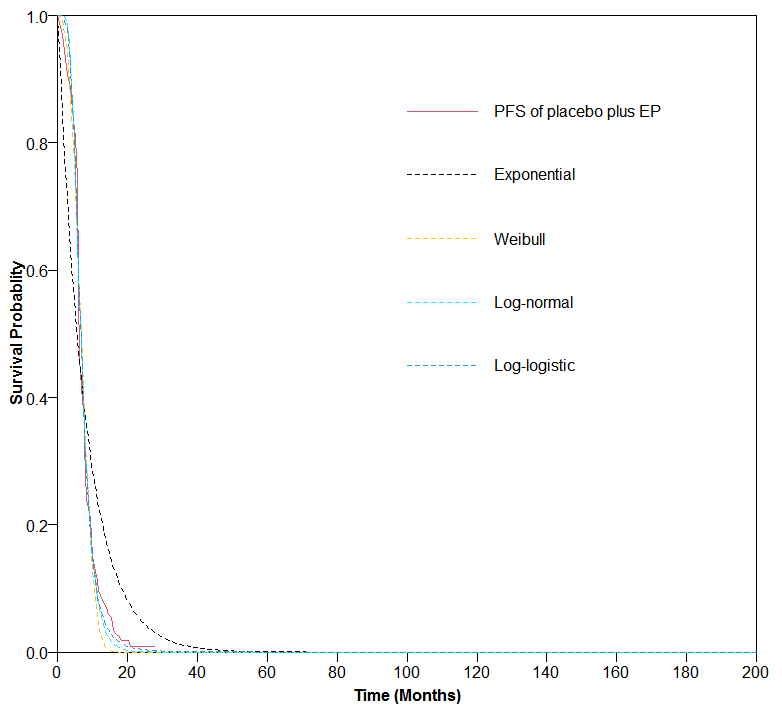


(d)

Figure S2. Parametric survival distributions fitted and extrapolated. (a)OS data fitted and extrapolated for pembrolizumab plus EP; (b)OS data fitted and extrapolated for placebo plus EP; (c)PFS data fitted and extrapolated for pembrolizumab plus EP; (d)PFS data fitted and extrapolated for placebo plus EP.
