# Supplementary material for: Cost-Effectiveness Analysis of Pembrolizumab Plus Chemotherapy as First-Line Therapy for Extensive-Stage Small-Cell Lung Cancer in the United States
Source: Preprints.org preprint supplement (doi:10.20944/preprints202102.0068.v1), 2021-02-01
Supplement: Supplementary file 2 [file Table S1-S3.docx]

Table S1. Treatment regimens and dosage in the Model

| Regimens | Dose Sizes | Infusion Timing | Ref |
| --- | --- | --- | --- |
| 1st-line pembrolizumab plus EP | pembrolizumab, 200 mg;  etoposide, 100 mg/m2;  carboplatin, AUC 5.0 mg/ml/min; or cisplatin, 75 mg/m2 | pembrolizumab, 3weeks up to 35 cycles;  EP, 3 weeks for the fist 4 cycles | Charles, et al., 20201 |
| 1st-line placebo plus EP | etoposide, 100 mg/m2;  carboplatin, AUC 5.0 mg/ml/min; or cisplatin, 75 mg/m2 | saline placebo, 3 weeks up for 35 cycles;  EP, 3 weeks for the fist 4 cycles | Charles, et al., 20201 |
| 2nd-line nivolumab plus ipilimumab | nivolumab, 3 mg/kg;  ipilimumab,1 mg/kg | nivolumab, 2 weeks;  Ipilimumab, 6 weeks | Hellmann, et al., 20192 |
| 2nd-line etoposide plus carboplatin | etoposide,100 mg/m2;  carboplatin, AUC 5.0 mg/ml/min | 3 weeks up to 6 cycles | Nathalie, et al., 20203 |
| 2nd-line topotecan | topotecan, 2.3 mg/m2 | 3 weeks up to 6 cycles | Nathalie, et al., 20203 |
| 2nd-line irinotecan | irinotecan, 50 mg/m2;  carboplatin, AUC5.0 mg/ml/min | 3 weeks up to 6 cycles | Schmittel, et al., 20064 |

EP, etoposide-platinum; AUC,area under the curve.

Table S2. Survival functions fitted and extrapolated

| Survival function | Pembrolizumab plus EP | | | | placebo plus EP | | | |
| --- | --- | --- | --- | --- | --- | --- | --- | --- |
|  | OS | | PFS | | OS | | PFS | |
|  | AIC | BIC | AIC | BIC | AIC | BIC | AIC | BIC |
| Exponential | -193.0 | -189.1 | -197.8 | -192.6 | -217.4 | -212.2 | -99.8 | -94.7 |
| Weibull | -228.1 | -222.2 | -280.6 | -272.8 | -389.6 | -381.7 | -287.9 | -280.3 |
| Log-normal | -293.3 | -284.7 | -334.9 | -327.1 | -435.7 | -427.6 | -311.8 | -304.2 |
| Log-logistic | -283.6 | -277.6 | -357.3 | -349.5 | -578.1 | -570.3 | -326.7 | -319.0 |

Table S3. Cost and Utility Parameters

| Parameters | Baseline values | Source |
| --- | --- | --- |
| Cost(2020 $US) |  |  |
| Regimen related costs |  |  |
| Pembrolizumab price/mg | 49.39 | CMS 2020 ASP Drug Pricing Files5 |
| Etoposide price/mg | 1.51 | CMS 2020 ASP Drug Pricing Files5 |
| Carboplatin price/mg | 0.06 | CMS 2020 ASP Drug Pricing Files5 |
| Cisplatin price/mg | 0.19 | CMS 2020 ASP Drug Pricing Files5 |
| Nivolumab price/mg | 27.81 | CMS 2020 ASP Drug Pricing Files5 |
| Ipilimumab price/mg | 153.13 | CMS 2020 ASP Drug Pricing Files5 |
| Topotecan price/mg | 414.63 | CMS 2020 ASP Drug Pricing Files5 |
| Irinotecan price/mg | 0.12 | CMS 2020 ASP Drug Pricing Files5 |
| Chemotherapy infusion 1 hour | 142.55 | CMS.gov6, HCPCS code 96413 |
| Chemotherapy infusion additional hour | 30.68 | CMS.gov6, HCPCS code 96415 |
| Adverse event management costs |  |  |
| Neutropenia | 12365 | hcupnet.ahrq.gov7 |
| Anemia | 7248 | hcupnet.ahrq.gov7 |
| Thrombocytopenia | 11198 | hcupnet.ahrq.gov7 |
| Pneumonia | 9057 | hcupnet.ahrq.gov7 |
| Other disease management costs |  |  |
| Outpatient follow-up visit | 52.33 | [Zhang](https://pubmed.ncbi.nlm.nih.gov/?term=Zhang+L&cauthor_id=33344252),et al.,20208 |
| Monthly supportive care | 637.00 | Criss,et al.,20198 |
| Death associated costs | 9433 | Criss,et al.,20198 |
| Utilities |  |  |
| >12 months prior to death | 0.834 | Insinga, et al., 201810 |
| 6-12 months prior to death | 0.765 | Insinga, et al., 201810 |
| 1-6 months prior to death | 0.709 | Insinga, et al., 201810 |
| 1 month prior to death | 0.563 | Insinga, et al., 201810 |

eReferences

1. C.M. Rudin, M.M. Awad, A. Navarro, et al. Pembrolizumab or Placebo Plus Etoposide and Platinum as First-Line Therapy for Extensive-Stage Small-Cell Lung Cancer: Randomized, Double-Blind, Phase III KEYNOTE-604 Study, J. Clin. Oncol. 38 (21) (2020) 2369-2379.
2. [Matthew D Hellmann](https://pubmed.ncbi.nlm.nih.gov/?term=Hellmann+MD&cauthor_id=31562796),[Luis Paz-Ares](https://pubmed.ncbi.nlm.nih.gov/?term=Paz-Ares+L&cauthor_id=31562796),[Reyes Bernabe Caro](https://pubmed.ncbi.nlm.nih.gov/?term=Bernabe+Caro+R&cauthor_id=31562796), etal. Nivolumab plus Ipilimumab in Advanced Non-Small-Cell Lung Cancer.N Engl J Med, 2019 Nov 21;381(21):2020-2031.
3. [Nathalie Baize](https://pubmed.ncbi.nlm.nih.gov/?term=Baize+N&cauthor_id=32888454), [Isabelle Monnet](https://pubmed.ncbi.nlm.nih.gov/?term=Monnet+I&cauthor_id=32888454), [Laurent Greillier](https://pubmed.ncbi.nlm.nih.gov/?term=Greillier+L&cauthor_id=32888454), etal. Carboplatin plus etoposide versus topotecan as second-line treatment for patients with sensitive relapsed small-cell lung cancer: an open-label, multicentre, randomised, phase 3 trial.Lancet Oncol. 2020 Sep;21(9):1224-1233.
4. [A Schmittel](https://pubmed.ncbi.nlm.nih.gov/?term=Schmittel+A&cauthor_id=16423848), [L Fischer von Weikersthal](https://pubmed.ncbi.nlm.nih.gov/?term=Fischer+von+Weikersthal+L&cauthor_id=16423848), [M Sebastian](https://pubmed.ncbi.nlm.nih.gov/?term=Sebastian+M&cauthor_id=16423848), etal. A randomized phase II trial of irinotecan plus carboplatin versus etoposide plus carboplatin treatment in patients with extended disease small-cell lung cancer.Ann Oncol.2006 Apr;17(4):663-7.
5. Centers for Medicare and Medicaid Services. October 2020 ASP drug pricing files. https://www.cms.gov/license/ama?file=/files/zip/october-2020-asp-pricing-file.zipl. Published October 3, 2020.Accessed October 20, 2020.
6. Physician Fee Schedule Search. Centers for Medicare & Medicaid Services; 2020. https://www.cms.gov/apps/physician-fee-schedule/search/search-criteria.aspx. Accessed October 2020.
7. Agency for Healthcare Research and Quality, U.S. Department of Health & Human Services. Healthcare cost and utilization project. https://hcupnet.ahrq.gov. Accessed October 12, 2020.
8. L. Zhang, Y. Hang, M. Liu, N. Li, H. Cai. First-Line Durvalumab Plus Platinum-Etoposide Versus Platinum-Etoposide for Extensive-Stage Small-Cell Lung Cancer: A Cost-Effectiveness Analysis, Front Oncol 10 (2020) 602185.
9. S.D. Criss, M.J. Mooradian, T.R. Watson, J.F. Gainor, K.L. Reynolds, C.Y. Kong. Cost-effectiveness of Atezolizumab Combination Therapy for First-Line Treatment of Metastatic Nonsquamous Non-Small Cell Lung Cancer in the United States, JAMA Netw Open 2 (9) (2019) e1911952.
10. Agency for Healthcare Research and Quality, U.S. Department of Health & Human Services. Healthcare cost and utilization project. https://hcupnet.ahrq.gov. Accessed October 12, 2020.
